# Supplementary material for: O-GlcNAcylation Signal Mediates Proteasome Inhibitor Resistance in Cancer Cells by Stabilizing NRF1
Source: PubMed Central journal article supplement (PMC6094050; doi:10.1128/mcb.00252-18), 2018-08-15
Supplement: MCB.00252-18_zmb999101820s1.pdf [file MCB.00252-18_zmb999101820s1.pdf]

**Supplemental Figure S1**

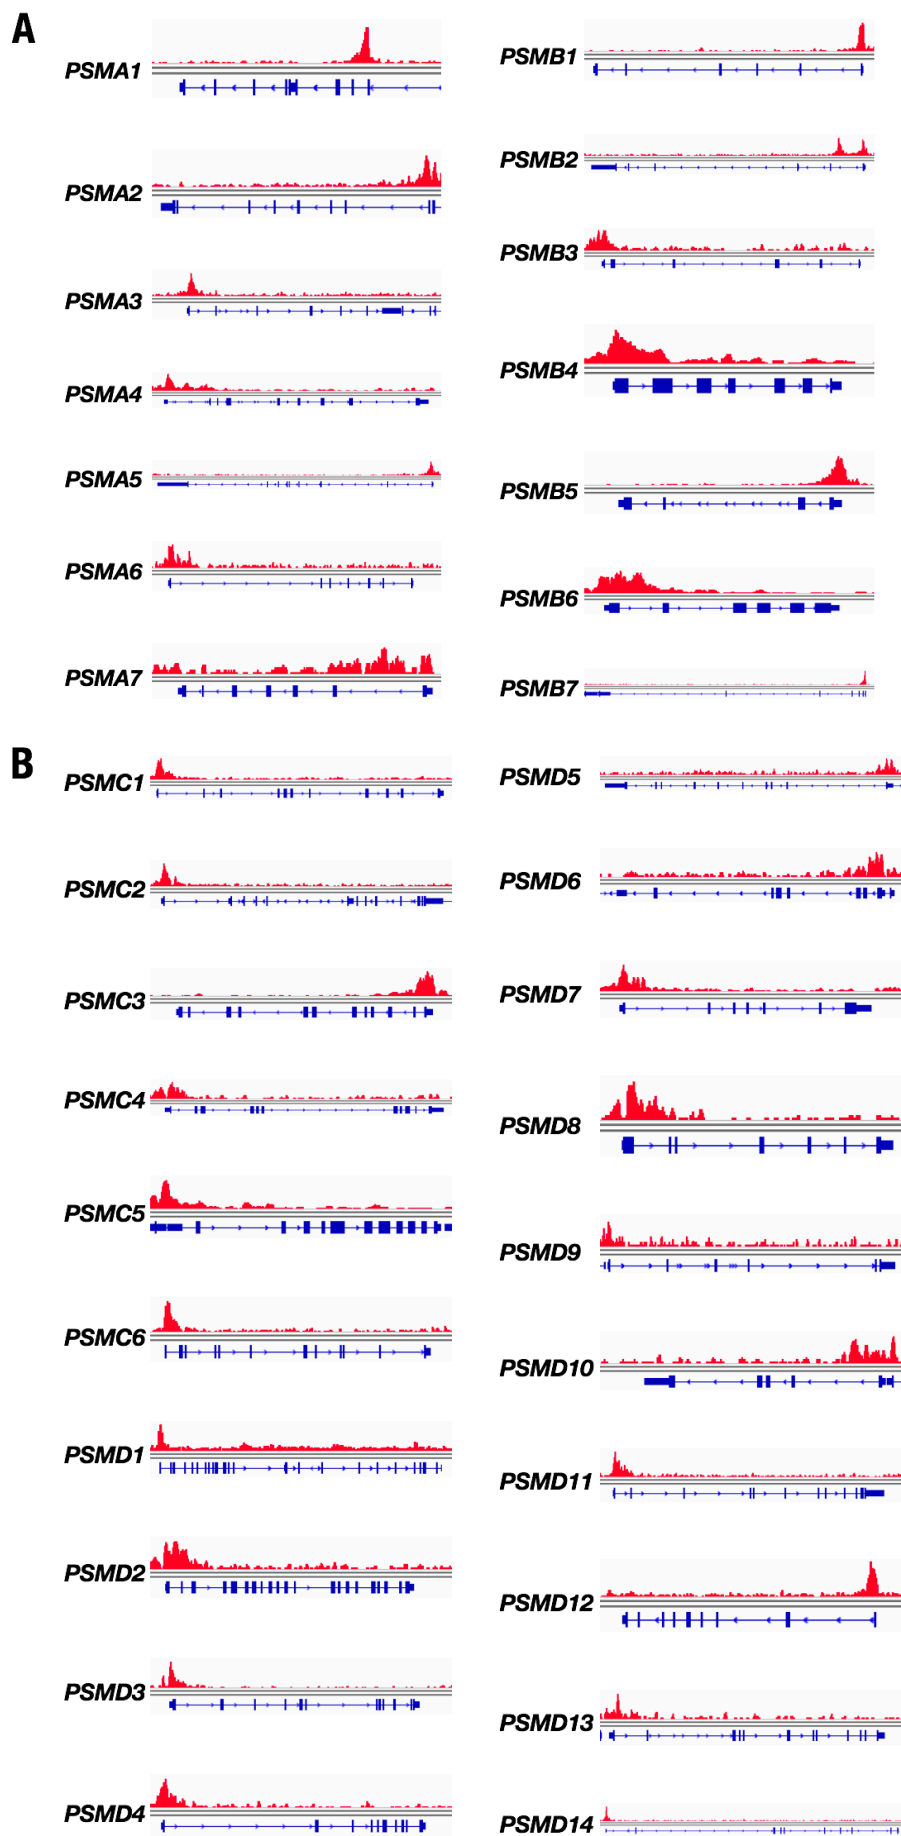

**Supplemental FIG S1** NRF1 binds to promoter regions of proteasome subunit genes. (A) NRF1 ChIP-Seq peaks in PSMA and PSMB gene loci. (B) NRF1 ChIP-Seq peaks in PSMC and PSMD gene loci.
